# Supplementary material for: Hematopoietic stem cell aging promotes TET2 clonal hematopoiesis
Source: Research Square preprint supplement (doi:10.21203/rs.3.rs-8704827/v1), 2026-02-09
Supplement: Supplementary file 1 [file 376513ca3963c212f17482cb.pdf]

Extended Data Figure 1

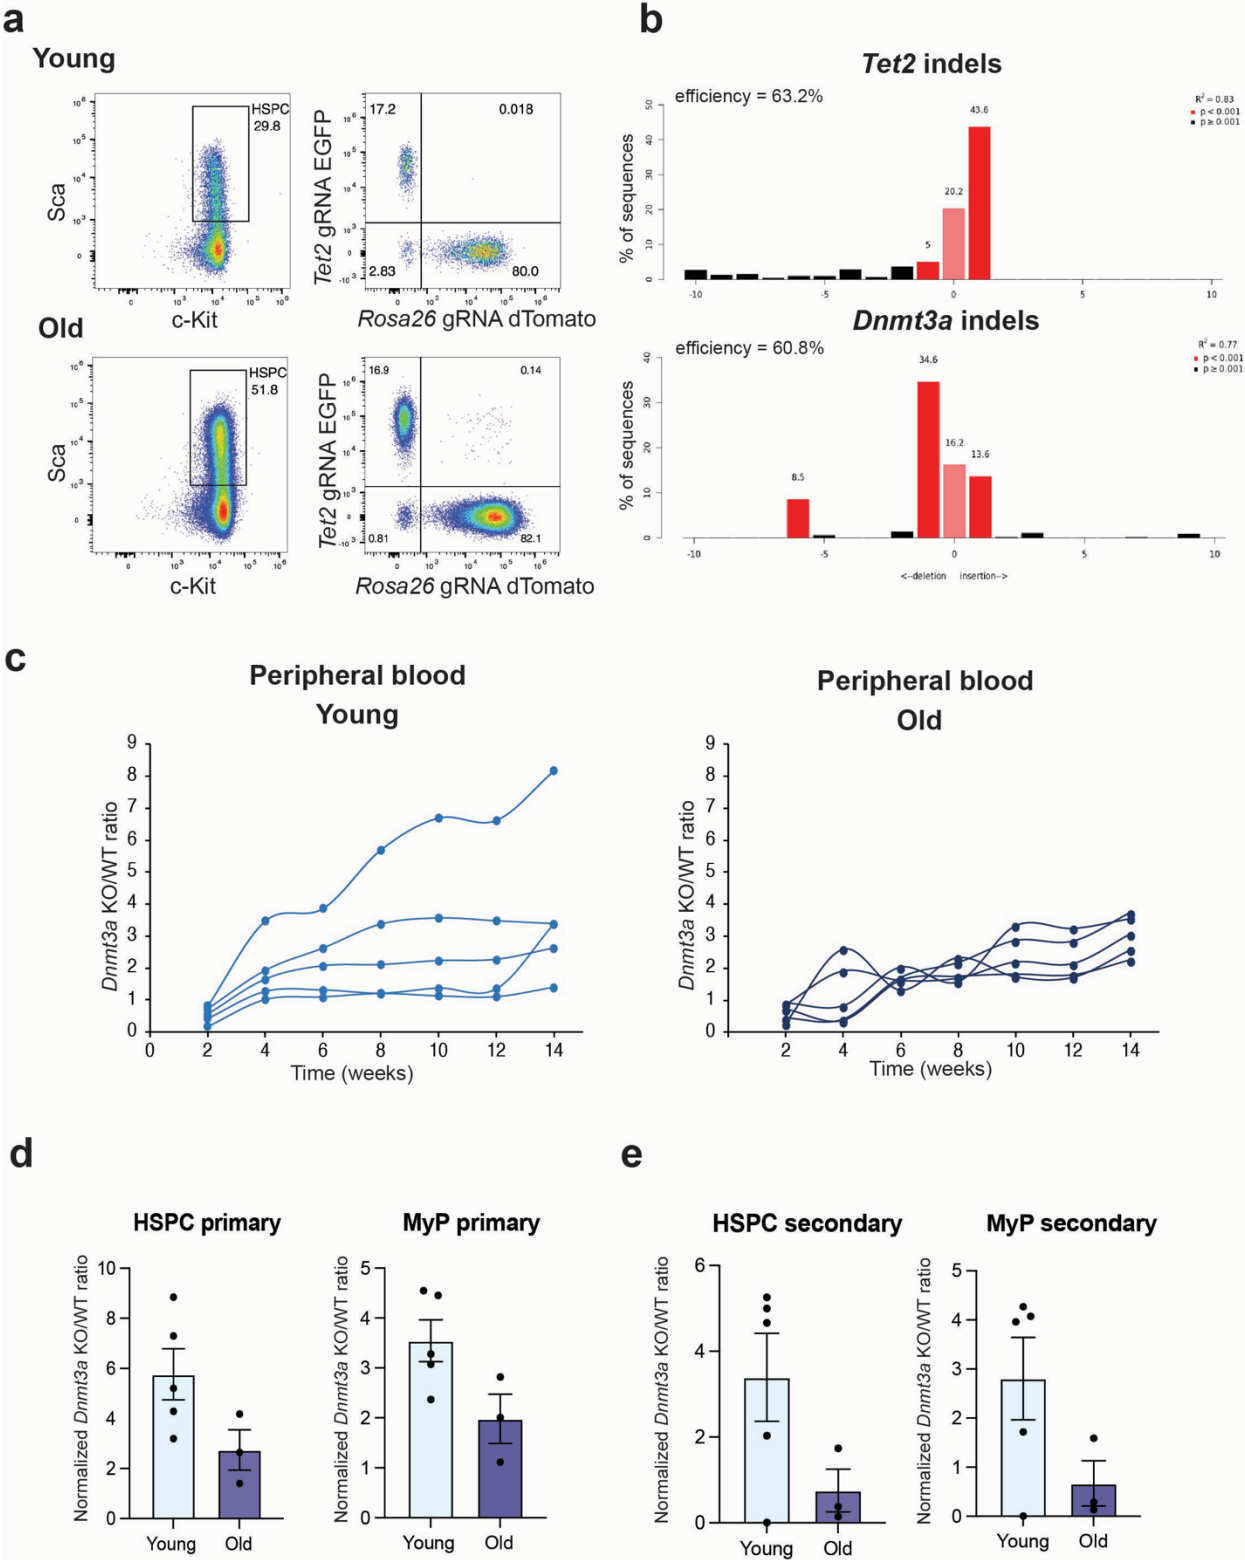

**Extended Data Fig. 1 | *Dnmt3a* KO hematopoietic cells are not selected with aging.**

**a)** representative flow cytometry analysis of donor cells at the end of the in vitro CRISPR protocol, at the time of transplantation; left panels are gated on live, lineage<sup>NEG</sup> cells, right panels are gated on HSPC. **b)** results from TIDE analysis of PCR products spanning the genomic target regions of *Tet2* CRISPR (top) or *Dnmt3a* CRISPR (bottom) from cells subjected to CRISPR for the indicated genes. **c)** Ratio of *Dnmt3a* KO/WT cells over time in the peripheral blood of recipient young or old mice. **d-e)** relative *Dnmt3a* KO/WT expansion normalized by the ratio of transplanted cells in the bone marrow MyP or HSC of recipient mice at 16 weeks after primary transplantation (**d**) or 16 weeks after secondary transplantation (**e**).

Extended Data Figure 2

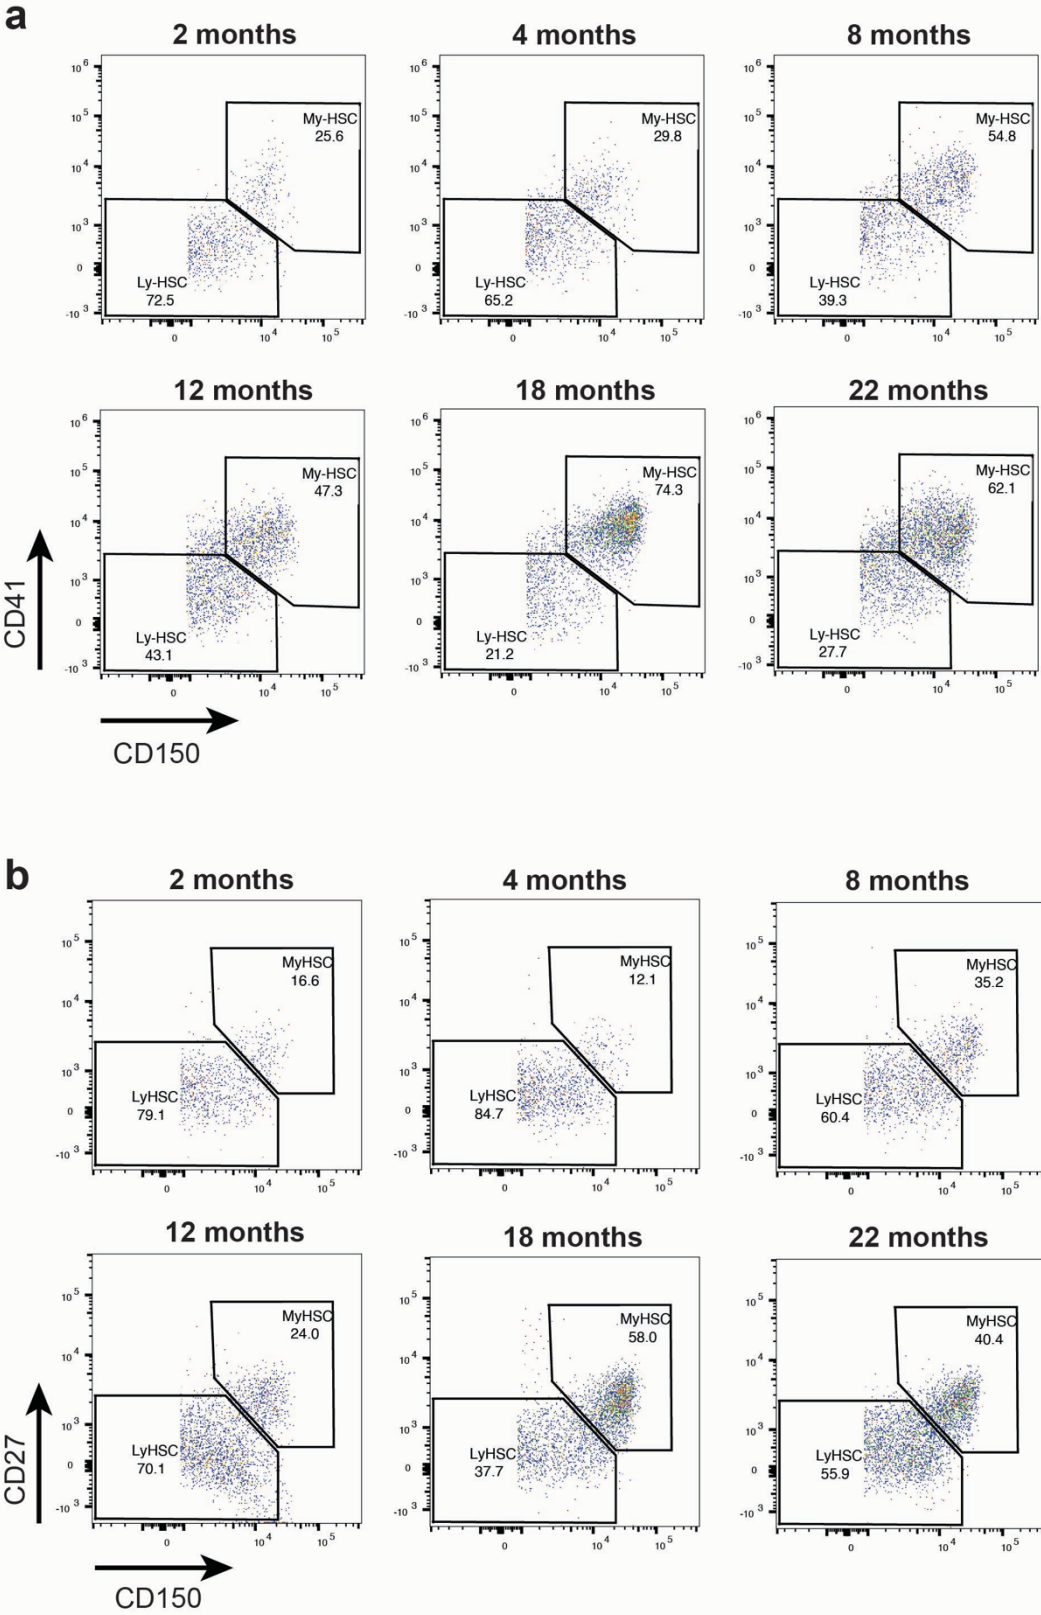

**Extended Data Fig. 2 | Aging is associated with increased flow cytometry detection of myeloid biased HSC expressing CD150, CD41 and CD27.** Flow cytometry analysis of bone marrow HSC from female mice of the indicated ages and MyHSC quantification by CD150-CD41 expression (**a**) or CD150-CD27 expression (**b**).

## Extended data Figure 3

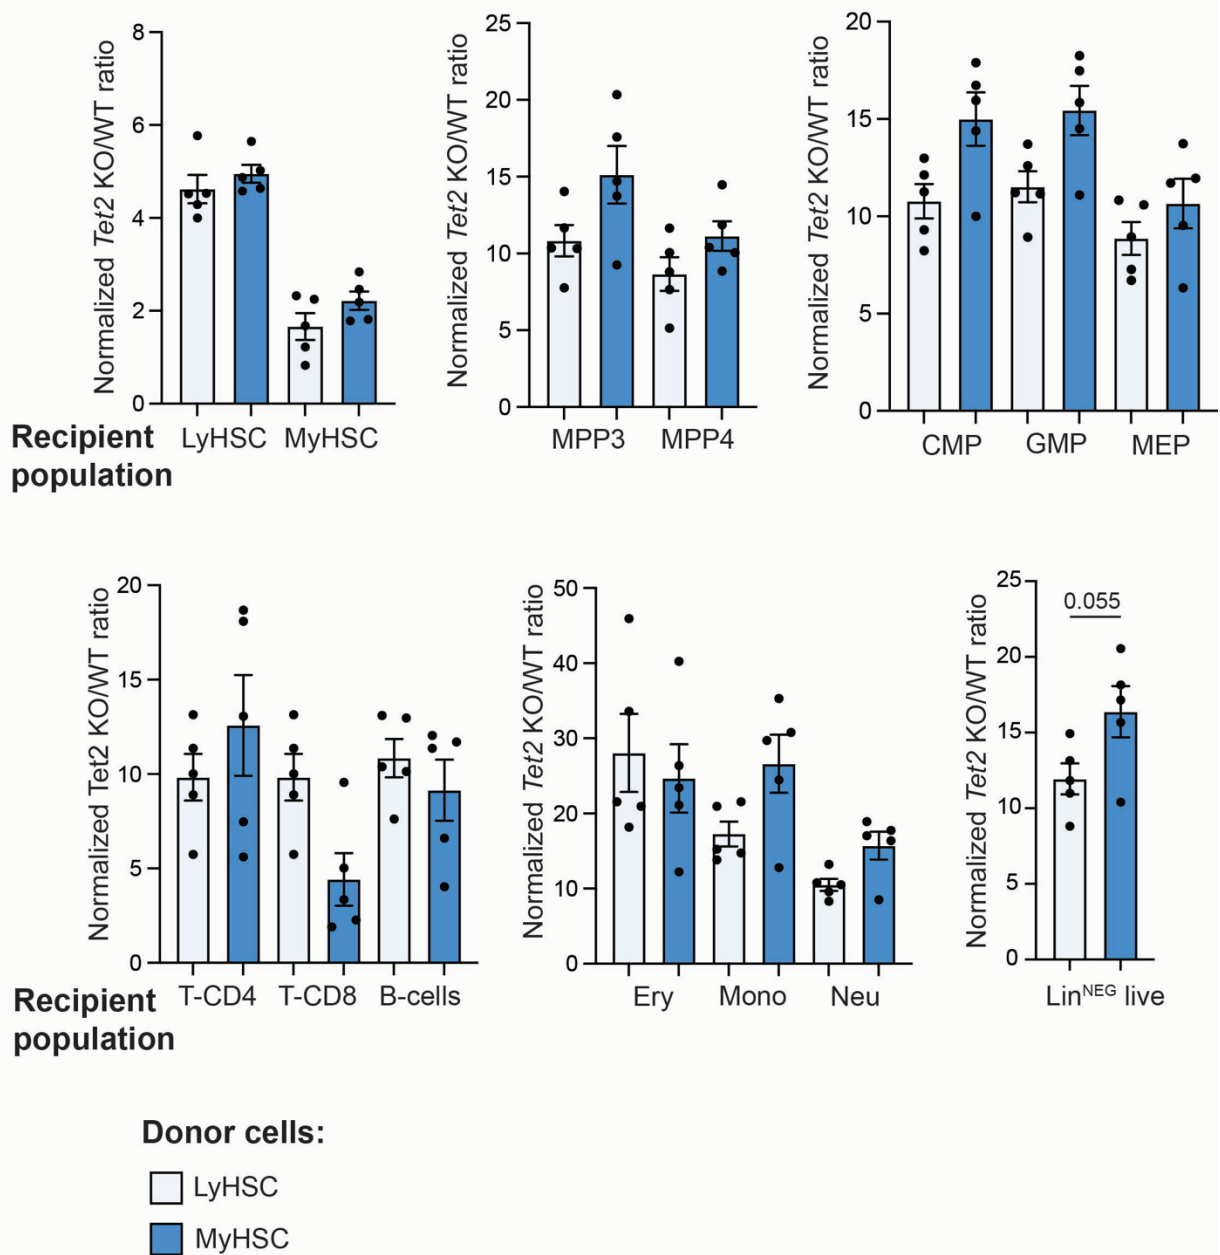

**Extended Data Fig. 3 | *Tet2* KO cells from aged donor MyHSC or LyHSC show similar levels of selection.** Relative *Tet2* KO/WT expansion normalized by the ratio of transplanted cells for the indicated donor LyHSC or MyHSC cells in the different populations in the bone marrow of recipient mice 12 weeks post-transplantation.

Extended Data Figure 4

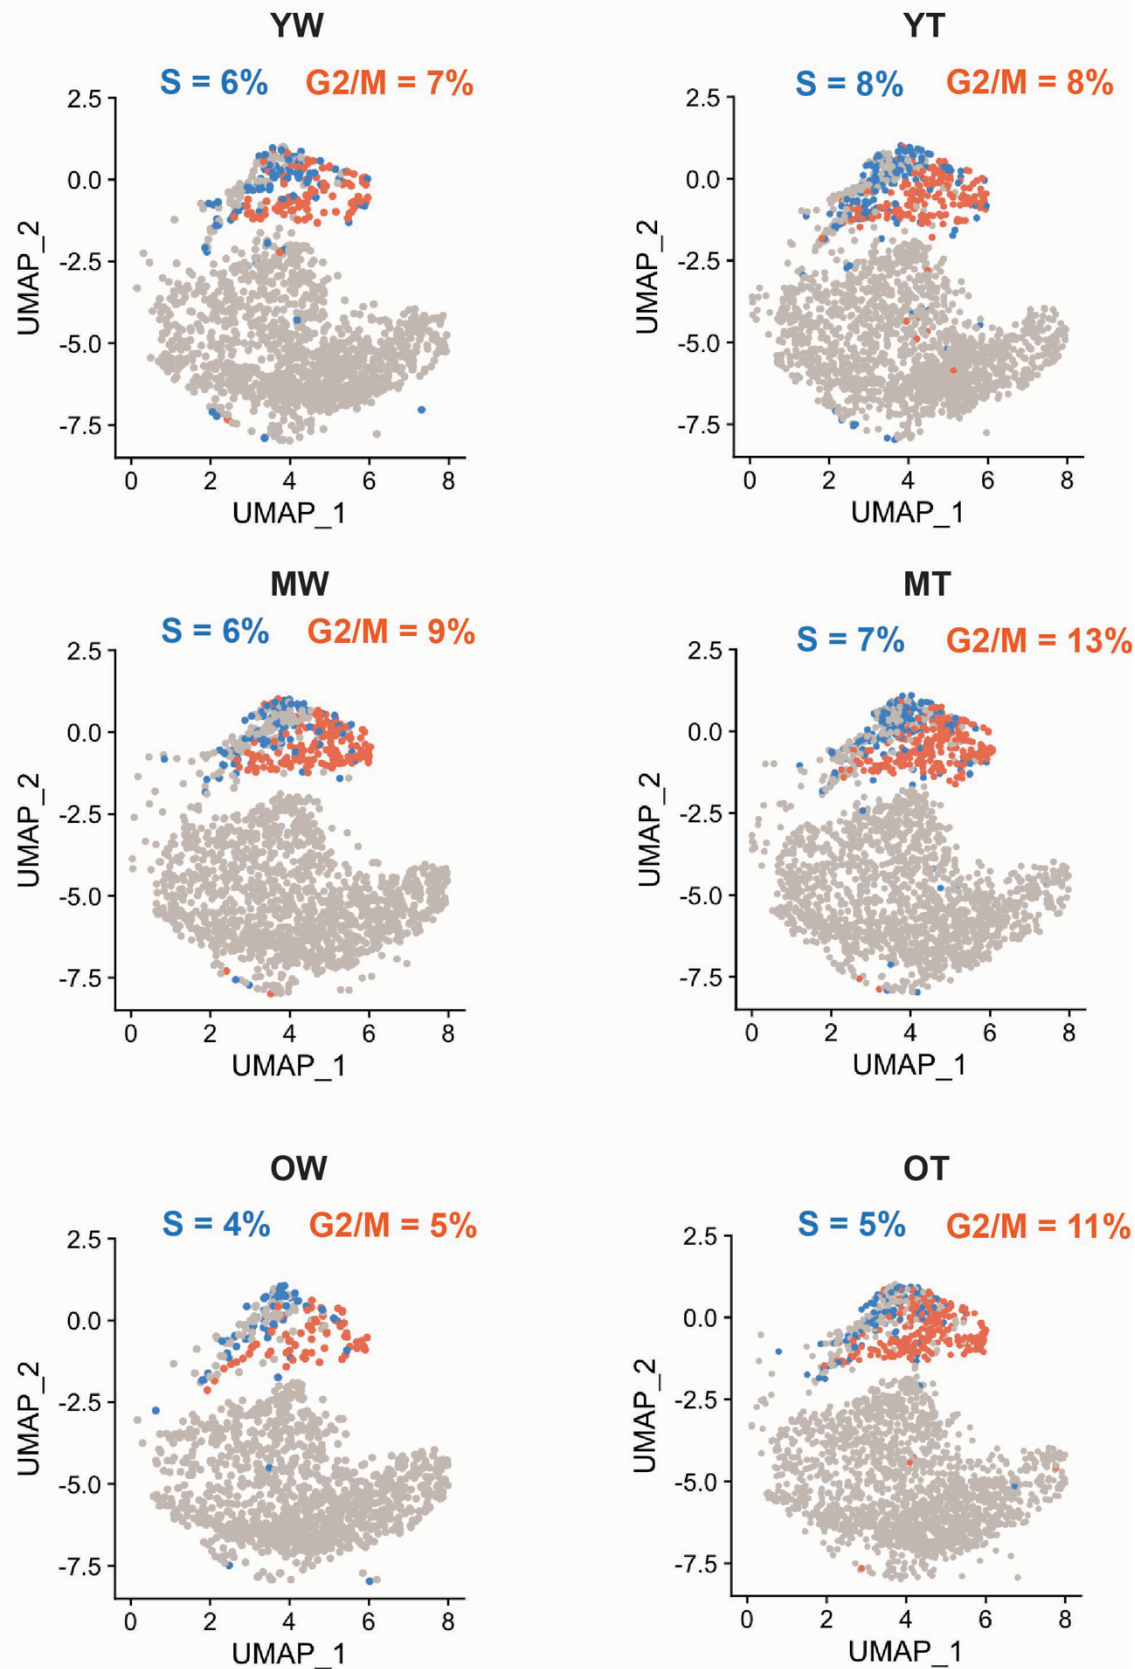

**Extended data Fig. 4 | Reduced cycling HSC with aging are rescued by *Tet2* KO.**

Colored UMAP for cell cycle analysis displaying S and G/2M fraction of cells in LT + ST-HSC based on gene expression.

Extended Data Figure 5

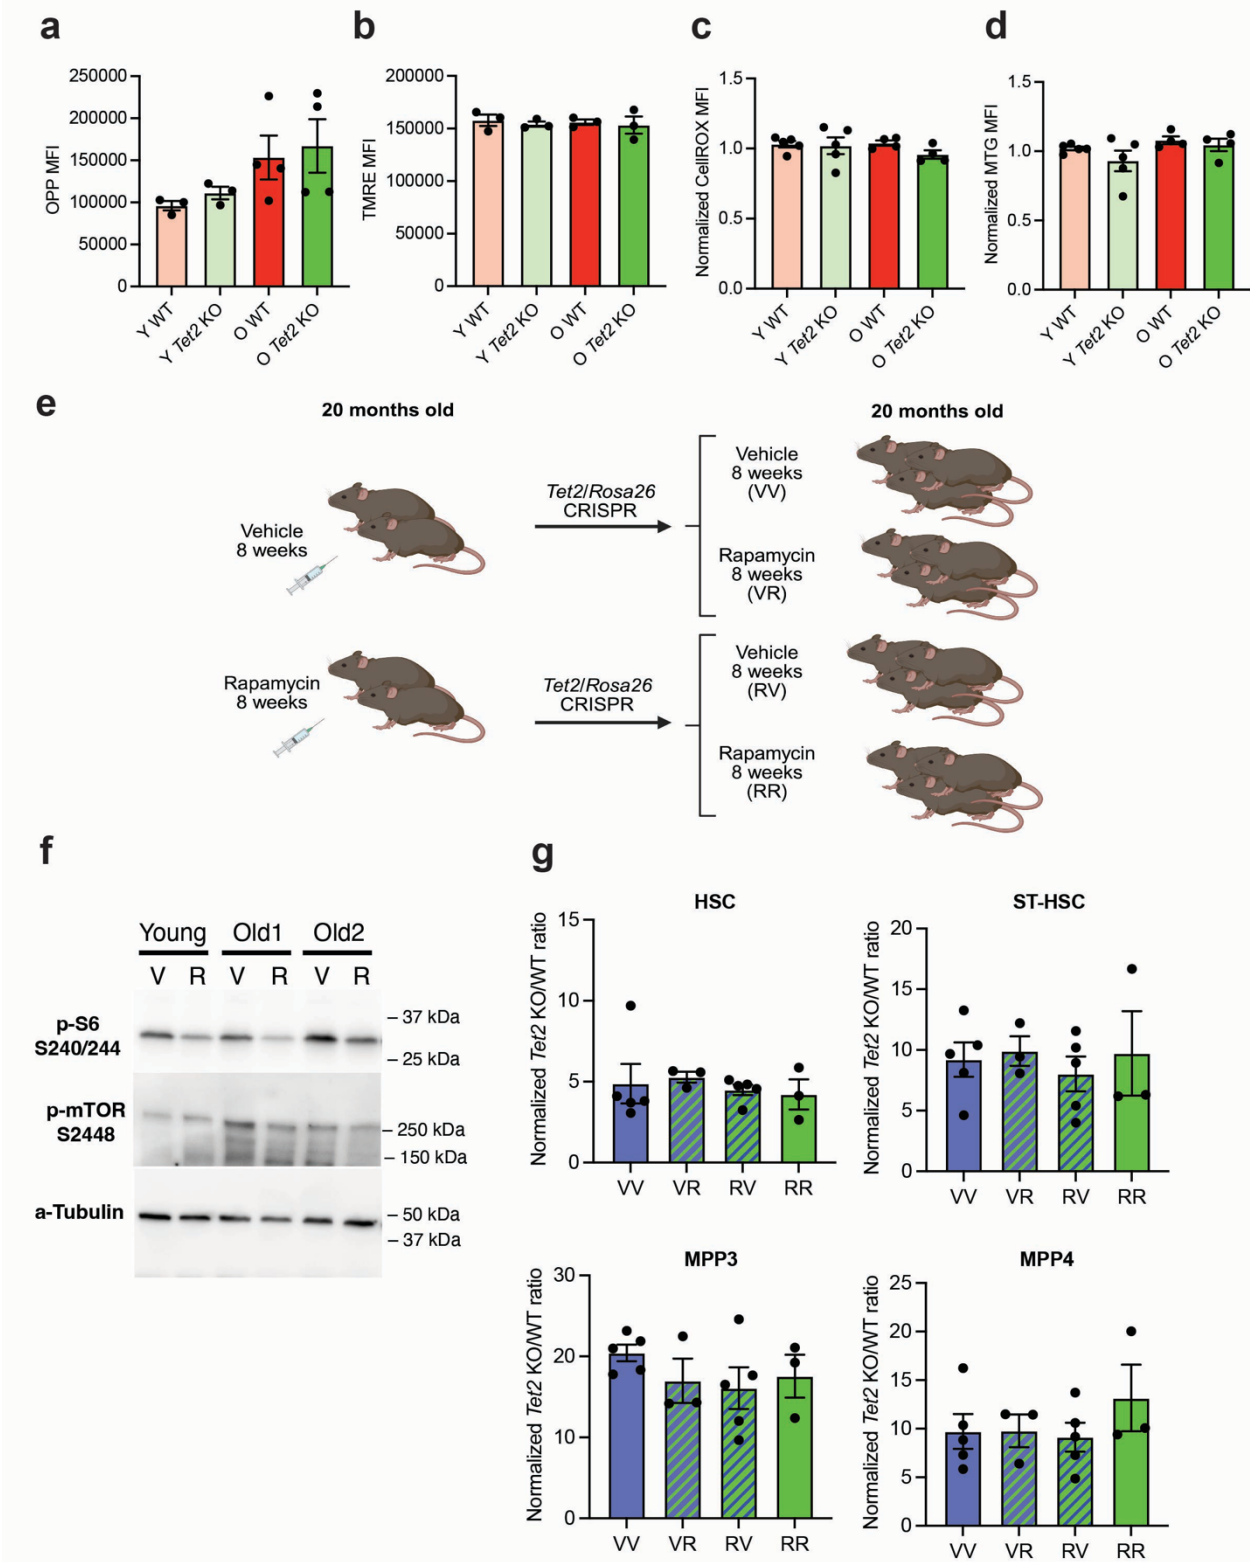



**Extended Data Fig. 5 | Selection of *Tet2* KO cells with aging is not dependent on alterations in mitochondrial and ribosomal functions.** **a)** Analysis of translation efficiency by OPP staining of the indicated populations in the bone marrow 12 weeks post competitive transplantation of *Tet2* KO or WT cells. **b)** Analysis of mitochondrial membrane potential by TMRE staining of the indicated populations in the bone marrow 12 weeks post non-competitive transplantation of *Tet2* KO or WT cells (EGFP tagged transplanted in different mice). **c-d)** analysis of ROS abundance by CellROX staining (**c**) or mitochondrial mass by MTG staining (**d**) of the indicated populations in the bone marrow 12 weeks post non-competitive transplantation of *Tet2* KO or WT cells (dTomato tagged transplanted in different mice). **e)** Experimental design of rapamycin intervention to assess the role in *Tet2* KO age-related expansion. **f)** Immunoblot analysis of c-Kit-enriched bone marrow cells from one young or two old non-transplanted mice administered one dose of rapamycin and sacrificed 12 hours later. **g)** Relative *Tet2* KO/WT expansion in the indicated recipient BM populations normalized by the ratio of transplanted cells from mice treated with rapamycin or vehicle as indicated.

**Supplementary Table 1. Ribosomal protein genes modulating p53.**

| <b>Ribosomal protein</b> | <b>References</b>                                                                      |
|--------------------------|----------------------------------------------------------------------------------------|
| RPL11                    | Zhang et al. Molecular Cell Biology 2003 <sup>1</sup>                                  |
| RPL15                    | Shi et al. Cancer Cell International 2022 <sup>2</sup>                                 |
| RPL22                    | Cao et al. Oncotarget 2017 <sup>3</sup> ; Jansen et al. Cell Reports 2024 <sup>4</sup> |
| RPL23                    | Dai et al. Molecular Cell Biology 2004 <sup>5</sup>                                    |
| RPL26                    | Ofir-Rosenfeld et al. Molecular Cell 2008 <sup>6</sup>                                 |
| RPL37                    | Llanos et al. Cell Cycle 2010 <sup>7</sup> , Daftuar et al. PLOS 2013 <sup>8</sup>     |
| RPL4                     | He et al. Oncotarget 2015 <sup>9</sup>                                                 |
| RPL5                     | Dai et al. Journal of Biol Chem 2004 <sup>10</sup>                                     |
| RPL6                     | Bai et al. Nuclei Acid Research 2014 <sup>11</sup>                                     |
| RPS14                    | Zhou et al. Oncogene 2013 <sup>12</sup>                                                |
| RPS15                    | Daftuar et al. PLOS 2013 <sup>8</sup>                                                  |
| RPS15A                   | Chen et al. Intern Journal of Oncology 2016 <sup>13</sup>                              |
| RPS2                     | Cho et al. Biochem and Bioph Res Comm 2020 <sup>14</sup>                               |
| RPS20                    | Daftuar et al. PLOS 2013 <sup>8</sup>                                                  |
| RPS25                    | Zhang et al. Oncogene 2013 <sup>15</sup>                                               |
| RPS26                    | Cui et al Oncogene 2014 <sup>16</sup>                                                  |
| RPS27                    | Xiong et al. Oncogene 2011 <sup>17</sup>                                               |
| RPS27A                   | Sun et al. Journ of Biolog Chem 2011 <sup>18</sup>                                     |
| RPS27L                   | Xiong et al. Oncogene 2011 <sup>17</sup>                                               |
| RPS3                     | Yadavilli et al. DNA repair 2009 <sup>19</sup>                                         |
| RPS7                     | Sun et al. Journ of Biolog Chem 2011 <sup>18</sup>                                     |

## Supplementary Methods

### Flow cytometry

All flow cytometry experiments were analyzed with a BD CytoFLEX flow cytometer equipped with violet, blue, yellow and red lasers.

Peripheral blood was stained with the following antibody panel: Per-CP Cyanine 5.5. anti-mouse GR1 1:200, PE-Cyanine7 anti-mouse CD11b 1:200, APC-Cyanine 7 anti-mouse CD4 1:200, APC-Cyanine 7 anti-mouse CD8a 1:200, BV785 anti-mouse CD45R/B220 1:200, TruStain FcX (anti-mouse CD16/32) 1:100. Blood cell populations were defined as follows: Neutrophils (DAPI<sup>NEG</sup>, CD11b<sup>+</sup>, GR1<sup>+</sup>), Monocytes (DAPI<sup>NEG</sup>, CD11b<sup>+</sup>, GR1<sup>NEG</sup>), B-cells (DAPI<sup>NEG</sup>, B220<sup>+</sup>), T-cells (DAPI<sup>NEG</sup>, CD4<sup>+</sup>/CD8a<sup>+</sup>).

Bone marrow “Mature” antibody panel was as follows: APC anti-mouse c-Kit 1:100, PE-Cyanine7 anti-mouse CD11b 1:200, Brilliant Violet 605 anti-mouse CD45R/B220 1:100, Pacific Blue anti-mouse TER-119 1:200, Per-CP Cyanine 5.5 anti-mouse GR1 1:200, Alexa Fluor anti-mouse CD8a 1:200, Brilliant Violet 510 anti-mouse CD4 1:200, Brilliant Violet 785 anti-mouse Ly6C 1:200, Near-IR Dead Cell Stain Kit 1:200, TruStain FcX (anti-mouse CD16/32) 1:100. Cells were stained in 50  $\mu$ L of FACS buffer for 30 minutes, at 4 °C, in the dark. Cell populations were defined as follows: neutrophils (Near-IR<sup>NEG</sup>, c-Kit<sup>NEG</sup>, CD11b<sup>+</sup>, Ly-6C<sup>low</sup>, GR1<sup>+</sup>), monocytes (Near-IR<sup>-</sup>, c-Kit<sup>NEG</sup>, CD11b<sup>+</sup>, Ly-6C<sup>+</sup>, GR1<sup>low</sup>), B-cells (Near-IR<sup>NEG</sup>, c-Kit<sup>NEG</sup>, B220<sup>+</sup>), erythroid cells (Near-IR<sup>NEG</sup>, c-Kit<sup>-</sup>, TER-119<sup>+</sup>), CD4<sup>+</sup> T-cells (Near-IR<sup>NEG</sup>, c-Kit<sup>NEG</sup>, CD8a<sup>-</sup>, CD4<sup>+</sup>), CD8<sup>+</sup> T-cells (Near-IR<sup>NEG</sup>, c-Kit<sup>NEG</sup>, CD4<sup>NEG</sup>, CD8a<sup>+</sup>).

Bone Marrow “Progenitor” antibody panel was as follows: lineage cocktail (APC-Cyanine 7 anti-mouse TER-119 1:100, APC-Cyanine 7 anti-mouse CD3e 1:100, APC-Cyanine 7 anti-mouse CD8a 1:200, APC-Cyanine 7 anti-mouse CD45R/B220 1:200, APC-Cyanine 7 anti-mouse CD11b 1:200, APC-Cyanine 7 anti-mouse GR1 1:200), Brilliant Violet 785 anti-mouse Sca 1:100, PE-Cyanine 7 anti-mouse c-Kit 1:100, eFluor 660 anti-mouse CD34 1:200, APC-R700 anti-mouse CD16/32 1:100, Brilliant Violet 421 anti-mouse CD135 1:100, Brilliant Violet 711 anti-mouse CD127 1:100, Near-IR Dead Cell Stain Kit

1:200, IgG from rat serum 50 µg/mL. Cells were stained in 50 µL of FACS buffer for 30 minutes, at 4 °C, in the dark. Cell populations were defined as follows: myeloid progenitors/MyP (Near-IR<sup>NEG</sup>, lineage<sup>NEG</sup>, c-Kit<sup>+</sup>, Sca<sup>NEG</sup>), common lymphoid progenitors/CLP (Near-IR<sup>NEG</sup>, lineage<sup>NEG</sup>, c-Kit<sup>low</sup>, Sca<sup>low</sup>, CD127<sup>+</sup>, CD135<sup>+</sup>) common myeloid progenitors/CMP (Near-IR<sup>NEG</sup>, lineage<sup>NEG</sup>, c-Kit<sup>+</sup>, Sca<sup>NEG</sup>, CD34<sup>+</sup>, CD16/32<sup>NEG</sup>), granulocyte-monocyte progenitors (Near-IR<sup>NEG</sup>, lineage<sup>NEG</sup>, c-Kit<sup>+</sup>, Sca<sup>NEG</sup>, CD34<sup>+</sup>, CD16/32<sup>+</sup>), megakaryocyte erythrocyte progenitors/MEP (Near-IR<sup>NEG</sup>, lineage<sup>NEG</sup>, c-Kit<sup>+</sup>, Sca<sup>NEG</sup>, CD34<sup>NEG</sup>, CD16/32<sup>NEG</sup>).

Bone Marrow “Stem” antibody panel was as follows: lineage cocktail (see above), APC-Anti mouse Sca 1:100, PE-Cyanine 7 anti-mouse c-Kit 1:100, Brilliant Violet 421 anti-mouse CD135, Alexa Fluor 700 anti-mouse CD48 1:100, Brilliant Violet 785 anti-mouse CD150 1:100, Brilliant Violet 711 anti-mouse CD41 1:100, IgG from rat serum 50 µg/mL. Cells were stained in 100 µL of FACS buffer for 30 minutes, at 4 °C, in the dark. Cell population were defined as follows: myeloid progenitors/MP (Near-IR<sup>NEG</sup>, lineage<sup>-</sup>, c-Kit<sup>+</sup>, Sca<sup>NEG</sup>), HSPC (Near-IR<sup>NEG</sup>, lineage<sup>NEG</sup>, c-Kit<sup>+</sup>, Sca<sup>+</sup>), MPP4 (Near-IR<sup>NEG</sup>, lineage<sup>NEG</sup>, c-Kit<sup>+</sup>, Sca<sup>+</sup>, CD135<sup>+</sup>), MPP3 (Near-IR<sup>NEG</sup>, lineage<sup>-</sup>, c-Kit<sup>+</sup>, Sca<sup>+</sup>, CD135<sup>NEG</sup>, CD48<sup>+</sup>, CD150<sup>NEG</sup>), MPP2 (Near-IR<sup>NEG</sup>, lineage<sup>NEG</sup>, c-Kit<sup>+</sup>, Sca<sup>+</sup>, CD135<sup>NEG</sup>, CD48<sup>+</sup>, CD150<sup>+</sup>), short-term HSC/ST-HSC (Near-IR<sup>NEG</sup>, lineage<sup>NEG</sup>, c-Kit<sup>+</sup>, Sca<sup>+</sup>, CD135<sup>NEG</sup>, CD48<sup>NEG</sup>, CD150<sup>NEG</sup>), HSC (Near-IR<sup>NEG</sup>, lineage<sup>NEG</sup>, c-Kit<sup>+</sup>, Sca<sup>+</sup>, CD135<sup>NEG</sup>, CD48<sup>NEG</sup>, CD150<sup>+</sup>), lymphoid-biased HSC/LyHSC (Near-IR<sup>NEG</sup>, lineage<sup>NEG</sup>, c-Kit<sup>+</sup>, Sca<sup>+</sup>, CD135<sup>NEG</sup>, CD48<sup>NEG</sup>, CD150<sup>low</sup>, CD41<sup>NEG</sup>), myeloid biased HSC/MyHSC (Near-IR<sup>NEG</sup>, lineage<sup>NEG</sup>, c-Kit<sup>+</sup>, Sca<sup>+</sup>, CD135<sup>NEG</sup>, CD48<sup>NEG</sup>, CD150<sup>high</sup>, CD41<sup>+</sup>).

For RNA FISH-Flow cells were stained with the following antibody cocktail: APC-Cyanine 7 anti-mouse TER-119 1:100, APC-Cyanine 7 anti-mouse CD3e 1:100, APC-Cyanine 7 anti-mouse CD8a 1:200, APC-Cyanine 7 anti-mouse CD45R/B220 1:200, APC-Cyanine 7 anti-mouse CD11b 1:200, APC-Cyanine 7 anti-mouse GR1 1:200 Brilliant Violet 785 anti-mouse Sca 1:100, Brilliant Violet 711 anti-mouse c-Kit 1:100, Alexa Fluor 700 anti mouse CD48 1:100, Brilliant Violet 605 anti mouse CD150 1:100, IgG from rat serum 50 µg/mL.

For OPP analysis cells were stained with the following antibody cocktail: lineage cocktail (APC-Cyanine 7 anti-mouse TER-119 1:100, APC-Cyanine 7 anti-mouse CD3e 1:100, APC-Cyanine 7 anti-mouse CD8a 1:200, APC-Cyanine 7 anti-mouse CD45R/B220 1:200, APC-Cyanine 7 anti-mouse CD11b 1:200, APC-Cyanine 7 anti-mouse GR1 1:200), Brilliant Violet 421 anti-mouse Sca 1:100, PE-Cyanine 7 anti-mouse c-Kit 1:100, Brilliant Violet 785 anti-mouse CD150 1:100, Alexa Fluor 700 anti mouse CD48 1:100, IgG from rat serum 50 µg/mL.

For TMRE assay cells were stained with the following antibody cocktail: lineage cocktail (APC-Cyanine 7 anti-mouse TER-119 1:100, APC-Cyanine 7 anti-mouse CD3e 1:100, APC-Cyanine 7 anti-mouse CD8a 1:200, APC-Cyanine 7 anti-mouse CD45R/B220 1:200, APC-Cyanine 7 anti-mouse CD11b 1:200, APC-Cyanine 7 anti-mouse GR1 1:200), APC anti-mouse Sca 1:100, PE-Cyanine 7 anti-mouse c-Kit 1:100, Brilliant Violet 785 anti-mouse CD150 1:100, Brilliant Violet 421 anti mouse CD135 1:100, Alexa Fluor 700 anti mouse CD48 1:100, Near-IR Dead Cell Stain Kit 1:200, IgG from rat serum 50 µg/mL.

For MTG and CellROX assay cells were stained with the following antibody cocktail: (APC-Cyanine 7 anti-mouse TER-119 1:100, APC-Cyanine 7 anti-mouse CD3e 1:100, APC-Cyanine 7 anti-mouse CD8a 1:200, APC-Cyanine 7 anti-mouse CD45R/B220 1:200, APC-Cyanine 7 anti-mouse CD11b 1:200, APC-Cyanine 7 anti-mouse GR1 1:200), APC anti-mouse Sca 1:100, Brilliant violet 711 anti-mouse c-Kit 1:100, Brilliant Violet 785 anti-mouse CD150 1:100, Brilliant Violet 421 anti mouse CD135 1:100, Alexa Fluor 700 anti mouse CD48 1:100, IgG from rat serum 50 µg/mL.

**Supplementary table 2. Reagents and resources details.**

| REAGENT or RESOURCE                             | SOURCE      | IDENTIFIER     |
|-------------------------------------------------|-------------|----------------|
| <b>Antibodies</b>                               |             |                |
| APC-Cyanine 7 anti-mouse TER-119                | Biolegend   | Cat#116223     |
| APC-Cyanine 7 anti-mouse CD3e                   | Biolegend   | Cat#100330     |
| APC-Cyanine 7 anti-mouse CD4                    | Biolegend   | Cat#100526     |
| APC-Cyanine 7 anti-mouse CD8a                   | Biolegend   | Cat#100714     |
| APC-Cyanine 7 anti-mouse CD45RB220              | Biolegend   | Cat#103224     |
| APC-Cyanine 7 anti-mouse Ly-6G/Ly-6C (GR-1)     | Biolegend   | Cat#108424     |
| APC Cyanine 7 anti-mouse CD11b                  | BD          | Cat#557657     |
| APC anti-mouse Ly-6A/E (Sca-1)                  | eBioscience | Cat#17-5981-83 |
| PE-Cyanine 7 anti-mouse CD117 (c-Kit)           | eBioscience | Cat#25-1171-82 |
| PE-Cyanine 7 anti-mouse CD11b                   | eBioscience | Cat#25-0112-82 |
| FITC anti mouse CD48                            | Biolegend   | Cat#103404     |
| Alexa Fluor 700 anti mouse CD48                 | Biolegend   | Cat#103426     |
| Brilliant Violet 421 anti-mouse CD150           | Biolegend   | Cat#115943     |
| Brilliant Violet 605 anti-mouse CD150           | Biolegend   | Cat#115937     |
| Brilliant Violet 785 anti-mouse CD150           | Biolegend   | Cat#115927     |
| Brilliant Violet 711 anti-mouse CD127           | Biolegend   | Cat#135035     |
| Brilliant Violet 421 anti-mouse CD135           | Biolegend   | Cat#135314     |
| Brilliant Violet 711 anti-mouse CD41            | BD          | Cat#740712     |
| Brilliant Violet 785 anti-mouse CD45R/B220      | Biolegend   | Cat#103246     |
| Brilliant Violet 605 anti-mouse CD45R/B220      | Biolegend   | Cat#103244     |
| Brilliant Violet 510 anti mouse CD4             | Biolegend   | Cat#100559     |
| Brilliant Violet 785 anti-mouse Ly-6C           | Biolegend   | Cat#128041     |
| Brilliant Violet 711 anti-mouse CD117 (c-Kit)   | Biolegend   | Cat#105835     |
| PE/Dazzle 594 anti-mouse CD41                   | Biolegend   | Cat#133935     |
| PE/Dazzle 594 anti-mouse IL27Ra                 | Biolegend   | Cat#159007     |
| eFluor 660 anti-mouse CD34                      | eBioscience | Cat#50-0341-82 |
| APC-R700 anti-mouse CD16/CD32                   | BD          | Cat#565502     |
| Alexa Fluor 700 anti-mouse CD8a                 | Biolegend   | Cat#100730     |
| Pacific Blue anti-mouse TER-119                 | Biolegend   | Cat#116208     |
| PE-Cyanine 7 anti-mouse CD11b                   | eBioscience | Cat#25-0112-82 |
| PE anti-mouse TER-119                           | Biolegend   | Cat#116223     |
| PE anti-mouse CD3e                              | BD          | Cat#553064     |
| PE anti-mouse CD4                               | Biolegend   | Cat#100408     |
| PE anti-mouse CD8a                              | Biolegend   | Cat#162304     |
| PE anti-mouse CD45RB220                         | BD          | Cat#553090     |
| PE anti-mouse Ly-6G/Ly-6C (GR-1)                | eBioscience | Cat#12-5931-82 |
| PE anti-mouse CD11b                             | BD          | Cat#557397     |
| PerCP Cyanine 5.5 anti-mouse Ly-6G/Ly-6C (GR-1) | Biolegend   | Cat#108428     |
| APC anti-mouse CD201 (EPCR)                     | Biolegend   | Cat#141506     |
| APC anti mouse CD117 (c-Kit)                    | BD          | Cat#555356     |
| TruStain FcX (anti-mouse CD16/32)               | Biolegend   | Cat#101320     |
| Anti-Mouse CD4 [Clone GK1.5]                    | Leinoco     | Cat#C1333      |
| Anti-Mouse CD8a (Ly 2.2) [Clone 2.43]           | Leinoco     | Cat#C380       |

|                                                                                 |                    |                   |
|---------------------------------------------------------------------------------|--------------------|-------------------|
| CD117 MicroBeads, mouse                                                         | Miltenyi           | Cat#130-097-146   |
| IgG from rat serum                                                              | Millipore Sigma    | Cat#I4131-50MG    |
| Phospho-S6 Ribosomal Protein (Ser240/244)                                       | CST                | Cat#2215S         |
| Phospho-mTOR (Ser2448)                                                          | CST                | Cat#2971S         |
| Anti-TUBA4A (TUBA1) Antibody                                                    | Millipore Sigma    | Cat#T6199         |
| Goat Anti-Rabbit IgG (H + L)-HRP Conjugate                                      | Biorad             | Cat#1706515       |
| Goat Anti-Mouse IgG (H + L)-HRP Conjugate                                       | Biorad             | Cat#1706516       |
| <b>Chemicals, peptides, and recombinant proteins</b>                            |                    |                   |
| PEI MAX® - Transfection Grade Linear Polyethylenimine Hydrochloride (MW 40,000) | Polysciences       | Cat#25765         |
| Poly(vinyl alcohol)<br>average Mw 146,000-186,000, 87-89% hydrolyzed            | Millipore Sigma    | Cat#363103        |
| Human Fibronectin                                                               | Millipore Sigma    | Cat#FC010         |
| SCF, Mouse                                                                      | Genescript         | Cat#Z02997-10     |
| TPO, Mouse                                                                      | Genescript         | Cat#Z03175-50     |
| Insulin-Transferrin-Selenium-Ethanolamine (ITS -X) (100X)                       | Gibco              | Cat#51500056      |
| DMEN, high glucose, pyruvate                                                    | Gibco              | Cat#11995065      |
| IMDM                                                                            | Gibco              | Cat#12440053      |
| Ham's F12 Nutrient Mix                                                          | Gibco              | Cat#11765054      |
| Penicillin-Streptomycin (10,000 U/mL)                                           | Gibco              | Cat#15140122      |
| HEPES (1M)                                                                      | Gibco              | Cat#15630080      |
| Fisherbrand™ Research Grade Fetal Bovine Serum, Canadian Sourced                | Fischer Scientific | Cat#FB12999102    |
| Sucrose                                                                         | Millipore Sigma    | Cat#S0389-5KG     |
| Histopaque®-1119                                                                | Millipore Sigma    | Cat#11191-6X100ML |
| DAPI                                                                            | ThermoFisher       | Cat#D3571         |
| Ammonium Chloride                                                               | Fischer Scientific | Cat#A661-500      |
| Potassium bicarbonate                                                           | Millipore Sigma    | Cat#237205-500G   |
| O-propargyl puromycin                                                           | Vector Labs        | Cat#CCT-1407-25   |
| Rapamycin                                                                       | MedChemExpress     | Cat#AY-22989      |
| Tetramethylrhodamine, Ethyl Ester, Perchlorate (TMRE)                           | ThermoFisher       | Cat#T669          |
| CellROX™ Green Reagent, for oxidative stress detection                          | ThermoFisher       | Cat#C10444        |
| MitoTracker™ Green FM Dye, for flow cytometry                                   | ThermoFisher       | Cat#M46750        |
| Sodium dodecyl sulphate                                                         | Millipore Sigma    | Cat#L5750         |
| Tween-20                                                                        | ThermoFisher       | Cat#BP330-500     |
| Tris Base                                                                       | ThermoFisher       | Cat#BP152-5       |
| Bromophenol Blue                                                                | Fisher Scientific  | Cat#AC403151000   |
| Sodium chloride                                                                 | Fisher Scientific  | Cat#S-6713        |
| Immobilon Western Chemiluminescent HRP Substrate                                | Millipore Sigma    | Cat#WBKLS0500     |
| Glycerol                                                                        | Fisher Scientific  | Cat#BP229-1       |
| <b>Critical commercial assays</b>                                               |                    |                   |
| T7-FlashScribe™ Transcription Kit                                               | Cellscript         | Cat#C-ASF3507     |
| ScriptCap™ Cap 1 Capping System                                                 | Cellscript         | Cat#C-SCCS1710    |

|                                                                              |                                    |                                                                                                                                   |
|------------------------------------------------------------------------------|------------------------------------|-----------------------------------------------------------------------------------------------------------------------------------|
| RNeasy Plus Micro Kit                                                        | Qiagen                             | Cat#74034                                                                                                                         |
| DNeasy Blood and Tissue Kit                                                  | Qiagen                             | Cat#69506                                                                                                                         |
| Plasmid Plus Maxi Kit                                                        | Qiagen                             | Cat#12943                                                                                                                         |
| LIVE/DEAD™ Fixable Near-IR Dead Cell Stain Kit, for 633 or 635 nm excitation | ThermoFisher                       | Cat#L10119                                                                                                                        |
| UltraComp eBeads™ Compensation Beads                                         | ThermoFisher                       | Cat#01-2222-42                                                                                                                    |
| LS columns                                                                   | Miltenyi                           | Cat#130-042-401                                                                                                                   |
| Click-&-Go® Plus 647 OPP                                                     | Vector labs                        | Cat#CTT-1496                                                                                                                      |
| BD Cytofix/Cytoperm™ Fixation/Permeabilization Kit                           | BD                                 | Cat#554714                                                                                                                        |
| 4-20% acrylamide mini protean TGX precast gels                               | Biorad                             | Cat#4561095                                                                                                                       |
| Phusion™ High-Fidelity DNA Polymerase                                        | NEB                                | Cat#M0530L                                                                                                                        |
| <b>Deposited data</b>                                                        |                                    |                                                                                                                                   |
| Aging and <i>Tet2</i> KO mouse scRNAseq data                                 | GEO                                | GSE310533                                                                                                                         |
| <b>Experimental models: Cell lines</b>                                       |                                    |                                                                                                                                   |
| HEK293T cells                                                                | Takara                             | Cat#632180                                                                                                                        |
| <b>Experimental models: Organisms/strains</b>                                |                                    |                                                                                                                                   |
| C57BL6/J                                                                     | Jackson laboratories               | Cat#000664                                                                                                                        |
| C57BL/6JN                                                                    | National Institute on Aging        | <a href="https://www.nia.nih.gov/research/dab/aged-rodent-colonies">https://www.nia.nih.gov/research/dab/aged-rodent-colonies</a> |
| <b>Oligonucleotides</b>                                                      |                                    |                                                                                                                                   |
| Mouse <i>Tet2</i> gRNA: GGTATATCGGAGATCGAGTG                                 | IDT (design: this paper)           | N/A                                                                                                                               |
| Mouse <i>Rosa26</i> gRNA: GCAATACCATGCCAGGTGGA                               | IDT (design: this paper)           | N/A                                                                                                                               |
| Mouse <i>Dnmt3a</i> gRNA: CAGGCCGAATTGTGTCTTGG                               | IDT (design: this paper)           | N/A                                                                                                                               |
| Mouse <i>Tet2</i> FW TIDE: ATTCAAGCCCCCTCTGGAGAA                             | IDT (design: this paper)           | N/A                                                                                                                               |
| Mouse <i>Tet2</i> REV TIDE: CCCACTCTATAGCTGGGCAAT                            | IDT (design: this paper)           | N/A                                                                                                                               |
| Mouse <i>Rosa26</i> FW TIDE: CCACATTGGCACCATAGTCA                            | IDT (design: this paper)           | N/A                                                                                                                               |
| Mouse <i>Rosa26</i> REV TIDE: AGCCATCTGGGCCTTTTAAC                           | IDT (design: this paper)           | N/A                                                                                                                               |
| Mouse <i>Dnmt3a</i> FW TIDE: GCTTGGCTTTGTACCTGAT                             | IDT (design: this paper)           | N/A                                                                                                                               |
| Mouse <i>Dnmt3a</i> REV TIDE: CAGCTCAGTGATGGTGGCTA                           | IDT (design: this paper)           | N/A                                                                                                                               |
| <b>Recombinant DNA</b>                                                       |                                    |                                                                                                                                   |
| pLCv2_U6.(BsmBI).chRNA2_EFS.EGFP_wPRE                                        | Yudovich et al.                    | N/A                                                                                                                               |
| pLCv2_U6.(BsmBI).chRNA2_EFS.dTomato_wPRE                                     | Yudovich et al. (dTomato inserted) | N/A                                                                                                                               |
| pMD2.G                                                                       | Addgene                            | Cat#12259                                                                                                                         |
| psPAX2                                                                       | Addgene                            | Cat#12260                                                                                                                         |
| pCas9-polyA                                                                  | Addgene                            | Cat#79602                                                                                                                         |
| <b>Software and algorithms</b>                                               |                                    |                                                                                                                                   |
| FlowJo™ v11                                                                  | BD                                 | <a href="https://flowjo.com/flowjo/overview">https://flowjo.com/flowjo/overview</a>                                               |
| GraphPad Prism v10                                                           | Dotmatics                          | <a href="https://www.graphpad.com/features">https://www.graphpad.com/features</a>                                                 |
| Biorender                                                                    | Biorender                          | <a href="https://www.biorender.com">https://www.biorender.com</a>                                                                 |



|             |                             |                                                                                                                                                                               |
|-------------|-----------------------------|-------------------------------------------------------------------------------------------------------------------------------------------------------------------------------|
| Shinyapps   | Anschutz Bioinformatic Core | <a href="https://bioinformatics.cuanschutz.edu">https://bioinformatics.cuanschutz.edu</a>                                                                                     |
| CRISPick    | CRISPick                    | <a href="https://portals.broadinstitute.org/gppx/crispick/public">https://portals.broadinstitute.org/gppx/crispick/public</a>                                                 |
| Illustrator | Adobe                       | <a href="https://www.adobe.com/creativecloud/plans.html?plan=edu&amp;product=illustrator">https://www.adobe.com/creativecloud/plans.html?plan=edu&amp;product=illustrator</a> |
| Primer3     | Primer3                     | <a href="http://frodo.wi.mit.edu/primer3/">http://frodo.wi.mit.edu/primer3/</a>                                                                                               |
| Heatmapper  | Heatmapper                  | <a href="http://heatmapper.ca">http://heatmapper.ca</a>                                                                                                                       |

## Supplementary references

1. Zhang, Y., Wolf, G.W., Bhat, K., Jin, A., Allio, T., Burkhart, W.A., and Xiong, Y. (2003). Ribosomal protein L11 negatively regulates oncoprotein MDM2 and mediates a p53-dependent ribosomal-stress checkpoint pathway. *Mol Cell Biol* 23, 8902-8912. 10.1128/mcb.23.23.8902-8912.2003.
2. Shi, R., and Liu, Z. (2022). RPL15 promotes hepatocellular carcinoma progression via regulation of RPs-MDM2-p53 signaling pathway. *Cancer Cell Int* 22, 150. 10.1186/s12935-022-02555-5.
3. Cao, B., Fang, Z., Liao, P., Zhou, X., Xiong, J., Zeng, S., and Lu, H. (2017). Cancer-mutated ribosome protein L22 (RPL22/eL22) suppresses cancer cell survival by blocking p53-MDM2 circuit. *Oncotarget* 8, 90651-90661. 10.18632/oncotarget.21544.
4. Jansen, J., Bohnsack, K.E., Böhlken-Fascher, S., Bohnsack, M.T., and Dobbstein, M. (2024). The ribosomal protein L22 binds the MDM4 pre-mRNA and promotes exon skipping to activate p53 upon nucleolar stress. *Cell Rep* 43, 114610. 10.1016/j.celrep.2024.114610.
5. Dai, M.S., Zeng, S.X., Jin, Y., Sun, X.X., David, L., and Lu, H. (2004). Ribosomal protein L23 activates p53 by inhibiting MDM2 function in response to ribosomal perturbation but not to translation inhibition. *Mol Cell Biol* 24, 7654-7668. 10.1128/mcb.24.17.7654-7668.2004.
6. Ofir-Rosenfeld, Y., Boggs, K., Michael, D., Kastan, M.B., and Oren, M. (2008). Mdm2 regulates p53 mRNA translation through inhibitory interactions with ribosomal protein L26. *Mol Cell* 32, 180-189. 10.1016/j.molcel.2008.08.031.
7. Llanos, S., and Serrano, M. (2010). Depletion of ribosomal protein L37 occurs in response to DNA damage and activates p53 through the L11/MDM2 pathway. *Cell Cycle* 9, 4005-4012. 10.4161/cc.9.19.13299.
8. Daftuar, L., Zhu, Y., Jacq, X., and Prives, C. (2013). Ribosomal proteins RPL37, RPS15 and RPS20 regulate the Mdm2-p53-MdmX network. *PLoS One* 8, e68667. 10.1371/journal.pone.0068667.
9. He, X., Li, Y., Dai, M.S., and Sun, X.X. (2016). Ribosomal protein L4 is a novel regulator of the MDM2-p53 loop. *Oncotarget* 7, 16217-16226. 10.18632/oncotarget.7479.
10. Dai, M.S., and Lu, H. (2004). Inhibition of MDM2-mediated p53 ubiquitination and degradation by ribosomal protein L5. *J Biol Chem* 279, 44475-44482. 10.1074/jbc.M403722200.
11. Bai, D., Zhang, J., Xiao, W., and Zheng, X. (2014). Regulation of the HDM2-p53 pathway by ribosomal protein L6 in response to ribosomal stress. *Nucleic Acids Res* 42, 1799-1811. 10.1093/nar/gkt971.

12. Zhou, X., Hao, Q., Liao, J., Zhang, Q., and Lu, H. (2013). Ribosomal protein S14 unties the MDM2-p53 loop upon ribosomal stress. *Oncogene* 32, 388-396. 10.1038/onc.2012.63.
13. Chen, J., Wei, Y., Feng, Q., Ren, L., He, G., Chang, W., Zhu, D., Yi, T., Lin, Q., Tang, W., et al. (2016). Ribosomal protein S15A promotes malignant transformation and predicts poor outcome in colorectal cancer through misregulation of p53 signaling pathway. *Int J Oncol* 48, 1628-1638. 10.3892/ijo.2016.3366.
14. Cho, J., Park, J., Shin, S.C., Kim, J.H., Kim, E.E., and Song, E.J. (2020). Ribosomal protein S2 interplays with MDM2 to induce p53. *Biochem Biophys Res Commun* 523, 542-547. 10.1016/j.bbrc.2020.01.038.
15. Zhang, X., Wang, W., Wang, H., Wang, M.H., Xu, W., and Zhang, R. (2013). Identification of ribosomal protein S25 (RPS25)-MDM2-p53 regulatory feedback loop. *Oncogene* 32, 2782-2791. 10.1038/onc.2012.289.
16. Cui, D., Li, L., Lou, H., Sun, H., Ngai, S.M., Shao, G., and Tang, J. (2014). The ribosomal protein S26 regulates p53 activity in response to DNA damage. *Oncogene* 33, 2225-2235. 10.1038/onc.2013.170.
17. Xiong, X., Zhao, Y., He, H., and Sun, Y. (2011). Ribosomal protein S27-like and S27 interplay with p53-MDM2 axis as a target, a substrate and a regulator. *Oncogene* 30, 1798-1811. 10.1038/onc.2010.569.
18. Sun, X.X., DeVine, T., Challagundla, K.B., and Dai, M.S. (2011). Interplay between ribosomal protein S27a and MDM2 protein in p53 activation in response to ribosomal stress. *J Biol Chem* 286, 22730-22741. 10.1074/jbc.M111.223651.
19. Yadavilli, S., Mayo, L.D., Higgins, M., Lain, S., Hegde, V., and Deutsch, W.A. (2009). Ribosomal protein S3: A multi-functional protein that interacts with both p53 and MDM2 through its KH domain. *DNA Repair (Amst)* 8, 1215-1224. 10.1016/j.dnarep.2009.07.003.
